# Supplementary material for: Mechanically Tough and Highly Stretchable Hydrogels Based on Polyurethane for Sensitive Strain Sensor
Source: MDPI journal article supplement (doi:10.3390/polym15193902), 2023-09-27
Supplement: s1 [file s1]

## Supporting Information

### Mechanically Tough and Highly Stretchable Hydrogels Based on Polyurethane for Sensitive Strain Sensor

Jianyang Shi <sup>1,2</sup>, Shuang Wang <sup>2</sup>, Haibo Wang <sup>1,2</sup> and Jun Gu <sup>1,2,\*</sup>

<sup>1</sup> Department of Cardiovascular Surgery, West China Hospital, Sichuan University, Chengdu 610065, China; sjy812001920@163.com (J.S.); whb6985@scu.edu.cn (H.W.)

<sup>2</sup> College of Biomass Science and Engineering, Sichuan University, Chengdu 610065, China; shuangshine7@scu.edu.cn

\* Correspondence: gujun@wchscu.cn; Tel.: +86-28-85401296

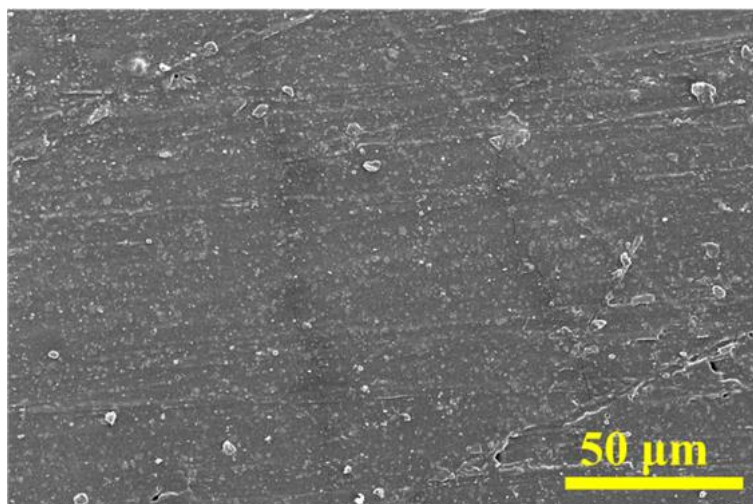

**Figure S1.** Cross-sectional SEM images of lyophilized PCA.

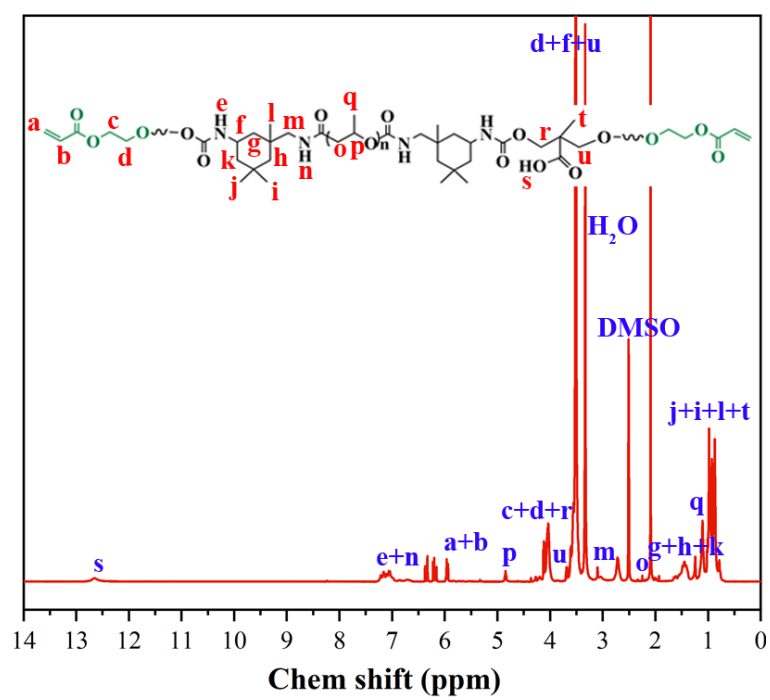

**Figure S2.** The  $^1\text{H}$  NMR spectrum of PCA ( $\text{DMSO}-d_6$ ).
